# Supplementary material
Source: publisher figshare collection journal article supplement (https://sage.figshare.com/ndownloader/files/14182736)
Supplement: Supplementary file 1 [file 14182736]

Appendix 1 : Search strategy and terms

PubMed

| **No.** | **Query** | **16/10/2018** |
| --- | --- | --- |
| [#6](https://www.ncbi.nlm.nih.gov/pubmed) | #4 NOT #5 | 281 |
| [#5](https://www.ncbi.nlm.nih.gov/pubmed) | "Vietnam Conflict"[MeSH] OR Vietnam War[tiab] OR Military[tiab] OR Asian American*[tiab] OR Vietnamese American*[tiab] | 51,475 |
| [#4](https://www.ncbi.nlm.nih.gov/pubmed) | #1 AND #2 AND #3 | 347 |
| [#3](https://www.ncbi.nlm.nih.gov/pubmed) | "Vietnam"[MeSH] OR vietnam*[tiab] OR viet nam*[tiab] OR vietnam*[ad] OR viet nam*[ad] OR hanoi[tiab] OR hanoi[ad] OR thai nguyen[tiab] OR thai nguyen[ad] OR hue[tiab] OR hue[ad] OR ho chi minh[tiab] OR ho chi minh[ad] | 26,014 |
| [#2](https://www.ncbi.nlm.nih.gov/pubmed) | "Cardiovascular Diseases"[Mesh] OR "Hypertension"[Mesh:noexp] OR cardiovascular*[tiab] OR cvd*[tiab] OR coronary disease*[tiab] OR heart disease*[tiab] OR hypertensi*[tiab] OR htn*[tiab] OR HBP[tiab] OR blood pressure*[tiab] OR BP[tiab] | 2,772,690 |
| [#1](https://www.ncbi.nlm.nih.gov/pubmed) | "Morbidity"[Mesh] OR "Epidemiology"[Mesh] OR "Global Burden of Disease"[Mesh] OR "Risk Factors"[Mesh] OR "Health Services Needs and Demand"[Mesh:noexp] OR "epidemiology" [Subheading] OR "Health Status"[Mesh] OR ((health[tiab] OR healthcare*[tiab]) AND (need[tiab] OR needs[tiab] OR needing*[tiab])) "health status"[tiab] OR "level of health"[tiab] OR health level*[tiab] OR prevalen*[tiab] OR inciden*[tiab] OR morbid*[tiab] OR risk factor*[tiab] OR burden[tiab] OR occurrence[tiab] | 2,361,250 |

CINAHL

| **No.** | **Query** | **16/10/2018** |
| --- | --- | --- |
| S8 | S6 NOT S7 | 40 |
| S7 | (MH "Vietnam Veterans") OR (MH "Immigrants+") OR TI ( “vietnam war” OR military OR “asian american*” OR “vietnamese american*” ) OR AB ( “vietnam war” OR military OR “asian american*” OR “vietnamese american*”) | 22,221 |
| S6 | S2 AND S4 AND S5 | 68 |
| S5 | (MH "Vietnam") OR AF ( vietnam* OR “viet nam*” OR hanoi OR “thai nguyen” OR hue OR “ho chi minh” ) OR TI ( vietnam* OR “viet nam*” OR hanoi OR “thai nguyen” OR hue OR “ho chi minh” ) OR AB ( vietnam* OR “viet nam*” OR hanoi OR “thai nguyen” OR hue OR “ho chi minh” ) OR (MH "Vietnamese") | 3,673 |
| S4 | ( S3) OR TI (cardiovascular* OR cvd* OR “coronary disease*” OR “heart disease*” OR hypertensi* OR htn* OR hbp OR “blood pressure*”) OR AB (cardiovascular* OR cvd* OR “coronary disease*” OR “heart disease*” OR hypertensi* OR htn* OR hbp OR “blood pressure*”) | 135,661 |
| S3 | (MH "Hypertension") OR (MH "Hypertensive Crisis") OR (MH "Hypertension, Isolated Systolic") OR (MH "Hypertension, Malignant") OR (MH "Hypertension, Refractory") OR (MH "Masked Hypertension") OR (MH "Metabolic Syndrome X") OR (MH "Prehypertension") | 35,773 |
| S2 | ( S1) OR TI (prevalen* OR inciden* OR morbid* OR “risk factor*” OR burden OR occurrence OR ((health OR healthcare*) AND (need OR needs OR needing*)) OR “health status” OR “level of health” OR “health level*”) OR AB (prevalen* OR inciden* OR morbid* OR “risk factor*” OR burden OR occurrence OR ((health OR healthcare*) AND (need OR needs OR needing*)) OR “health status” OR “level of health” OR “health level*”) | 483,116 |
| S1 | (MH "Health Services Needs and Demand+") OR (MH "Descriptive Research") OR (MH “Prevalence”) OR (MH “Incidence”) OR (MH “Burden”) OR (MH "Morbidity”) OR (MH “Epidemiology”) OR (MH “Risk Factor”) OR (MH "Social Determinants of Health") OR (MH "Health Status Disparities") | 156,468 |

Embase.com

| **No.** | **Query** | **16/10/2018** |
| --- | --- | --- |
| #6 | #4 NOT #5 | 601 |
| #5 | 'posttraumatic stress disorder'/exp OR 'vietnam war':ti,ab OR military:ti,ab OR 'asian american*':ti,ab OR 'vietnamese american*':ti,ab OR 'migration'/exp OR ptsd*:ti,ab OR 'posttraumatic stress disorder*':ti,ab OR 'post traumatic stress disorder*':ti,ab | 148,850 |
| #4 | #1 AND #2 AND #3 | 764 |
| #3 | 'viet nam'/exp OR vietnam*:ti,ab OR 'viet nam*':ti,ab OR vietnam*:ca OR 'viet nam*':ca OR hanoi:ti,ab OR hanoi:ca OR 'thai nguyen':ti,ab OR 'thai nguyen':ca OR hue:ti,ab OR hue:ca OR 'ho chi minh':ti,ab OR 'ho chi minh':ca | 27,055 |
| #2 | 'cardiovascular disease'/exp OR 'hypertension'/de OR 'essential hypertension'/exp OR 'borderline hypertension'/exp OR 'hypertensive crisis'/exp OR 'malignant hypertension'/exp OR 'metabolic syndrome x'/exp OR 'prehypertension'/exp OR 'resistant hypertension'/exp OR 'systolic hypertension'/exp OR cardiovascular*:ti,ab OR cvd*:ti,ab OR 'coronary disease*':ti,ab OR 'heart disease*':ti,ab OR hypertensi*:ti,ab OR htn*:ti,ab OR hbp:ti,ab OR 'blood pressure*':ti,ab | 4,336,496 |
| #1 | 'prevalence'/exp OR 'incidence'/exp OR 'morbidity'/exp OR 'cardiovascular risk'/exp OR 'risk factor'/exp OR prevalen*:ti,ab OR inciden*:ti,ab OR morbid*:ti,ab OR 'risk factor*':ti,ab OR burden:ti,ab OR occurrence:ti,ab OR seek*:ti,ab OR need:ti,ab OR needs:ti,ab OR needing*:ti,ab OR demand*:ti,ab | 5,191,861 |

Thomson Reuters/Web of Science

| **No.** | **Query** | **16/10/2018** |
| --- | --- | --- |
| #6 | #4 NOT #5  *Indexes=SCI-EXPANDED, SSCI, A&HCI, ESCI Timespan=All years* | 397 |
| #5 | TOPIC=(“vietnam war” OR military OR “asian american*” OR “vietnamese american*”)  *Indexes=SCI-EXPANDED, SSCI, A&HCI, ESCI Timespan=All years* | **103,316** |
| #4 | #3 AND #2 AND #1  *Indexes=SCI-EXPANDED, SSCI, A&HCI, ESCI Timespan=All years* | 518 |
| #3 | TOPIC=(vietnam* OR “viet nam*” OR hanoi OR “thai nguyen” OR hue OR “ho chi minh”)  *Indexes=SCI-EXPANDED, SSCI, A&HCI, ESCI Timespan=All years* | **53,521** |
| #2 | TOPIC=(cardiovascular* OR cvd* OR “coronary disease*” OR “heart disease*” OR hypertensi* OR htn* OR hbp OR “blood pressure*”)  *Indexes=SCI-EXPANDED, SSCI, A&HCI, ESCI Timespan=All years* | 1,361,774 |
| #1 | TOPIC=(prevalen* OR inciden* OR morbid* OR “risk factor*” OR burden OR occurrence OR ((health OR healthcare*) AND (need OR needs OR needing*)) OR “health status” OR “level of health” OR “health level*”)  *Indexes=SCI-EXPANDED, SSCI, A&HCI, ESCI Timespan=All years* | **3,470,902** |
